# Supplementary material
Source: Springer Nature journal article supplement (https://www.springermedizin.de/resource/supplementary/13075_2009_2756_MOESM4_ESM.pdf/9692820)

(a)

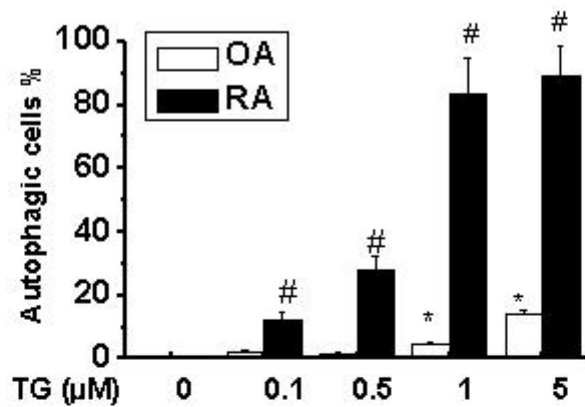

(b)

TG 5μM

0 12 24 36 48 0 12 24 36 48 (hr)

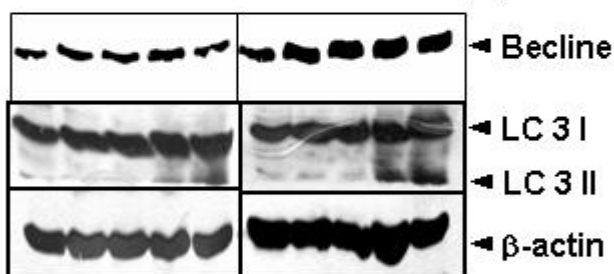

OA

RA

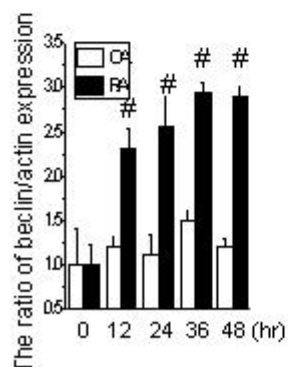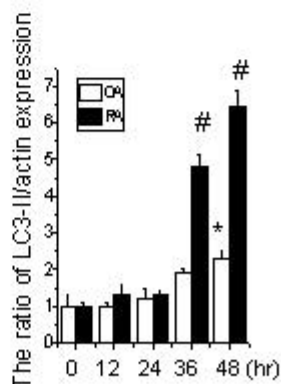

(c)

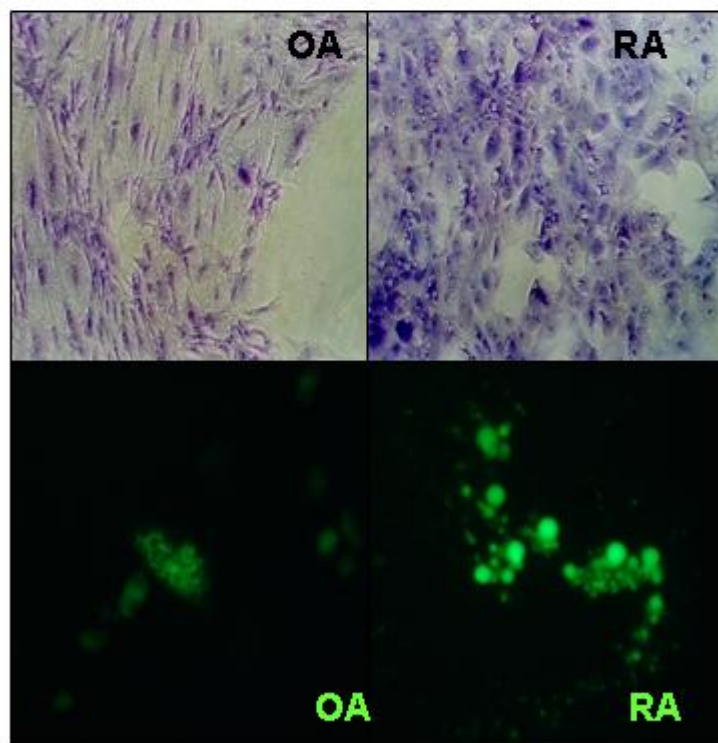

Supplement: MOESM4 [file 9692820]
